# Supplementary material for: Ultra-high resolution magnetic resonance microscopy of in situ gadolinium gold nanoparticle-labeled cells in the rat brain
Source: Royal Society of Chemistry journal article supplement (doi:10.1039/d5sc01588j), 2025-01-01

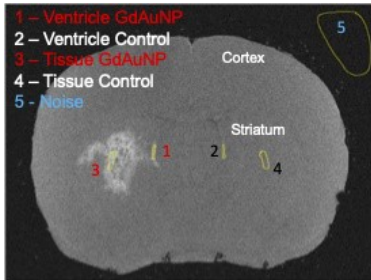

Supplement: d5sc01588j1.pdf [file d5sc01588j1.pdf]
