# Supplementary material for: Ultra-high resolution magnetic resonance microscopy of in situ gadolinium gold nanoparticle-labeled cells in the rat brain
Source: Royal Society of Chemistry journal article supplement (doi:10.1039/d5sc01588j), 2025-01-01
Supplement: d5sc01588j2.pdf [file d5sc01588j2.pdf]

## **Supplementary Figure Legends**

**Supplementary Figure 1. Regions-of-interests (ROIs) for signal-to-noise (SNR) and contrast-to-noise (CNR) measurements.** To determine the impact of GdAuNP on the T1-weighted signal, ROIs were drawn to calculate the CNR between areas with and without contrast injections. To assess the SNR, a noise measurement from outside the brain was used in comparison to brain tissue.
